# Supplementary material for: Force transmission through the inner kinetochore is enhanced by centromeric DNA sequences
Source: eLife journal article supplement (doi:10.7554/elife.105150), 2025-02-21

Free DNA

Wrap pre-SEC

SEC Fraction 5

SEC Fraction 6

SEC Fraction 7

Free DNA

Wrap pre-SEC

SEC Fraction 5

SEC Fraction 6

SEC Fraction 7

NCP

DNA

W601

CCEN

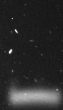

Supplement: fig1-data1 [file Figure 1-source data 1.pdf › Figure 1-source data 1.pdf]
